# Supplementary material for: Comparison of Four Ultrasonography-Based Risk Stratification Systems in Thyroid Nodules with Nondiagnostic/Unsatisfactory Cytology: A Real-World Study
Source: MDPI journal article supplement (doi:10.3390/cancers13081948), 2021-04-18
Supplement: s1 [file s1]

## Article

# Comparison of Four Ultrasonography-Based Risk Stratification Systems in Thyroid Nodules with Nondiagnostic/Unsatisfactory Cytology: A Real-World Study

You-Bin Lee, Young Lyun Oh, Jung Hee Shin, Sun Wook Kim, Jae Hoon Chung, Yong-Ki Min, Soo Yeon Hahn and Tae Hyuk Kim

**Table S1.** Histologic subtypes of excised nodules with nondiagnostic/unsatisfactory cytology.

| Histologic Subtype           | Number of Nodules (%) |
|------------------------------|-----------------------|
| <b>Malignant</b>             |                       |
| Total                        | 39 (100.0)            |
| Papillary thyroid carcinoma  | 32 (82.1)             |
| Follicular thyroid carcinoma | 6 (15.4)              |
| Medullary thyroid carcinoma  | 1 (2.6)               |
| <b>Nonmalignant</b>          |                       |
| Total                        | 50 (100.0)            |
| Benign follicular nodule     | 30 (60.0)             |
| Follicular adenoma           | 20 (40.0)             |

**Table S2.** Frequencies of ultrasound imaging characteristics and EU-TIRADS categories in included thyroid nodules with nondiagnostic/unsatisfactory cytology

| Ultrasound imaging characteristics                                                        | Number of nodules (%) |
|-------------------------------------------------------------------------------------------|-----------------------|
| <b>Composition</b>                                                                        |                       |
| Solid                                                                                     | 688 (60.2)            |
| Predominantly solid                                                                       | 316 (27.6)            |
| Predominantly cystic                                                                      | 129 (11.3)            |
| Cystic                                                                                    | 10 (0.9)              |
| <b>Echogenicity</b>                                                                       |                       |
| Hyperechoic                                                                               | 2 (0.2)               |
| Isoechoic                                                                                 | 677 (59.2)            |
| Mild hypoechoic                                                                           | 392 (34.3)            |
| Marked hypoechoic                                                                         | 62 (5.4)              |
| N/A (pure cyst)                                                                           | 10 (0.9)              |
| <b>Orientation</b>                                                                        |                       |
| Parallel                                                                                  | 1,075 (94.1)          |
| Non-parallel                                                                              | 68 (5.9)              |
| <b>Margin</b>                                                                             |                       |
| Smooth                                                                                    | 548 (47.9)            |
| Ill-defined                                                                               | 554 (48.5)            |
| spiculated/microlobulated                                                                 | 41 (3.6)              |
| <b>Calcification</b>                                                                      |                       |
| Microcalcification                                                                        | 129 (11.3)            |
| Other calcifications (macrocalcification or rim calcification) without microcalcification | 223 (19.5)            |

|                          |                |
|--------------------------|----------------|
| No calcification         | 791 (69.2)     |
| Final EU-TIRADS category |                |
| 2 (benign)               | 11 (1.0)       |
| 3 (low risk)             | 589 (51.5)     |
| 4 (intermediate risk)    | 300 (26.2)     |
| 5 (high risk)            | 243 (21.3)     |
| Total                    | 1,143 (100.0%) |

EU= European, TIRADS = Thyroid Imaging, Reporting and Data System.
